# Supplementary material
Source: PubMed Central journal article supplement (PMC7189330)
Supplement: NIHMS1579860-supplement-1.pdf [file NIHMS1579860-supplement-1.pdf]

**Molecular Cell, Volume 76**

**Supplemental Information**

**Transient Hysteresis in CDK4/6 Activity**

**Underlies Passage of the Restriction Point in G1**

**Mingyu Chung, Chad Liu, Hee Won Yang, Marielle S. Köberlin, Steven D. Cappell, and Tobias Meyer**

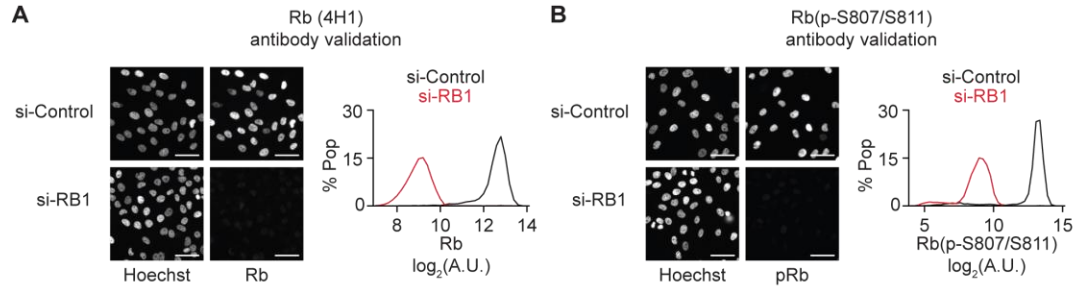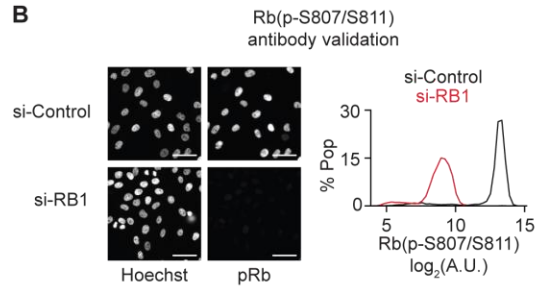

**C** Validation of 4i (iterative IF protocol) specificity

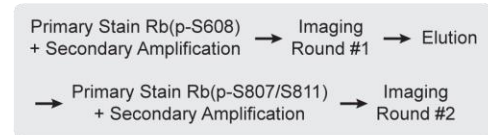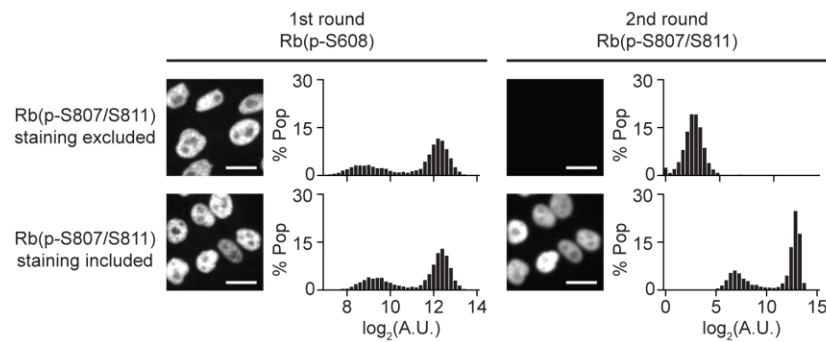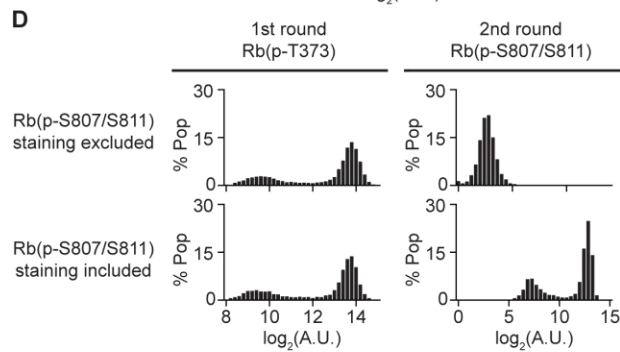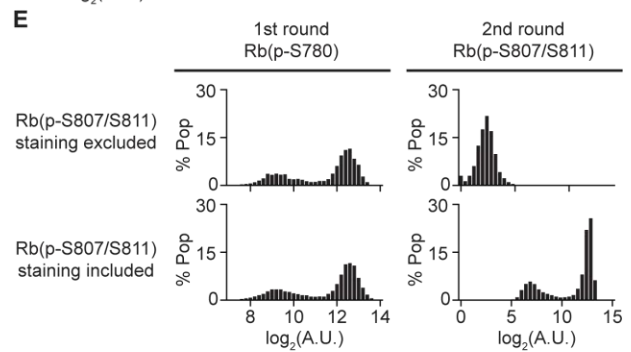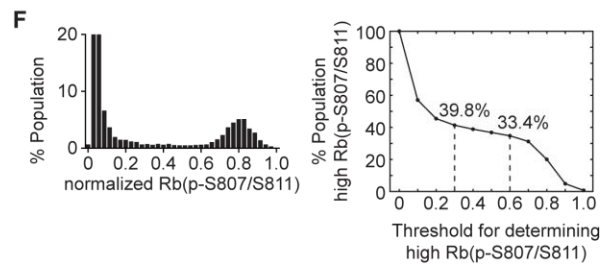

**Figure S1, Related to Figure 2.** (A,B) MCF-10A reverse-transfected with siRNA against RB1, fixed 24hrs later, and stained for (A) Rb and (B) Rb(p-S807/S811). Scale bar 50 $\mu$ m. n=8000 cells per condition. (C-E) Negative controls for 4i protocol to demonstrate complete stripping of first round primary stain. Top and bottom are identical, except second round primary antibody excluded in top. Controls for stripping of antibodies against (C) Rb(p-S608), (D) Rb(p-T373), and (E) Rb(p-S780). n=5000 cells per condition. (F) Same data as normalized Rb(p-S807/S811) from Figure 2F analyzed for percentage of cells above thresholds spanning entire range of normalized signal. Results highlight relative insensitivity of taking an arbitrary threshold of 0.5 to report the signal as high Rb(p-S807/S811). n=4629 cells.

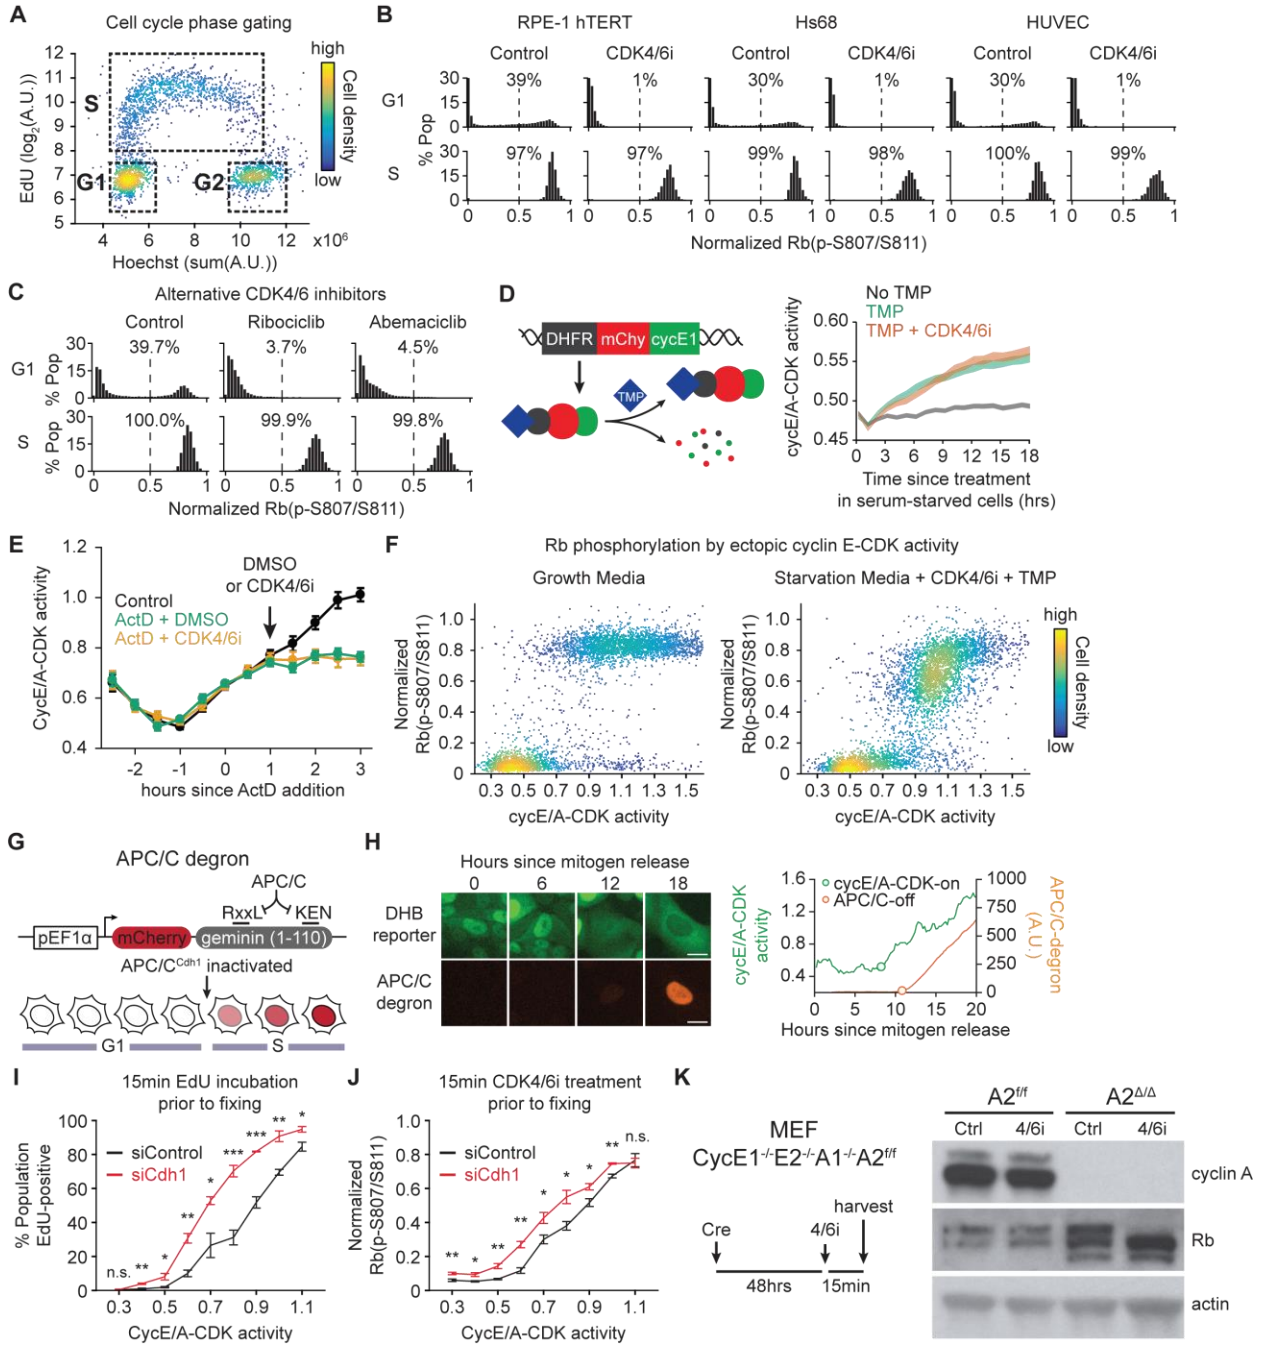

**Figure S2, Related to Figure 3.** (A) Cycling MCF-10A treated with EdU for 15min prior to fixing and staining with Hoechst. Scatter plot of Hoechst versus EdU.  $n=20000$  cells. (B) Cycling indicated cell types treated with EdU + CDK4/6i and fixed and stained for normalized Rb(p-S807/S811) and DNA content.  $n>900$  per condition. (C) Cycling MCF-10A treated with EdU + vehicle (DMSO), Ribociclib 3 $\mu$ M, or Abemaciclib 300nM for 15min prior to fixing and staining as in (B).  $n>4671$  cells per condition. (D) MCF-10A expressing cyclin E/A-CDK activity reporter and DHFR-mCherry-cyclin E1 mitogen-starved for 48hrs, then treated with vehicle, TMP 5 $\mu$ M, or TMP 5 $\mu$ M + CDK4/6i in starvation media. Shading represents 95% C-I;  $n>750$  cells per condition. (E) Asynchronously cycling MCF-10A expressing cyclin E/A-CDK activity reporter treated with Actinomycin D (1 $\mu$ g/mL) for 1hr prior to addition of vehicle or CDK4/6i. Cells computationally gated for increasing E/A activity in G1 at time of Actinomycin D treatment.  $n>2973$  cells per condition; error bars are std dev. (F) Same cells as in (D) treated for 18hrs with continued growth media or starvation media + CDK4/6i + TMP 10 $\mu$ M.  $n=5000$  cells per scatter plot. (G) Schematic of APC/C degron reporter. (H) MCF-10A expressing both cyclin E/A-CDK activity reporter and APC/C degron reporter. Images and quantification of sample cell. Scale bar 20 $\mu$ m. (I) Cycling cells as in (H) transfected with siRNA for 28hrs, then treated with EdU for 15min prior to fixing and staining.  $n>1432$  cells per condition.  $n=3$  replicates; SEM; 2-sample t-test (left to right):  $p=9.13E-1$ ,  $4.27E-3$ ,  $1.79E-2$ ,  $1.76E-3$ ,  $1.25E-2$ ,  $9.67E-4$ ,  $3.72E-4$ ,  $1.97E-3$ ,  $1.54E-2$ . (J) Same experiment as (I), but cells incubated with CDK4/6i for 15min prior to fixing and staining for normalized Rb(p-S807/S811).  $n>1980$  cells per condition.  $n=3$  replicates; SEM; 2-sample t-test:  $p=8.05E-3$ ,  $1.32E-2$ ,  $3.55E-3$ ,  $1.64E-3$ ,  $2.00E-2$ ,  $1.13E-2$ ,  $1.78E-2$ ,  $1.47E-3$ ,  $6.93E-1$ . (K) Indicated MEFs treated as shown and harvested for western blot. Representative of 2 replicates. Control/vehicle (DMSO), CDK4/6i (Palbociclib) 1 $\mu$ M, and EdU 10 $\mu$ M wherever indicated.

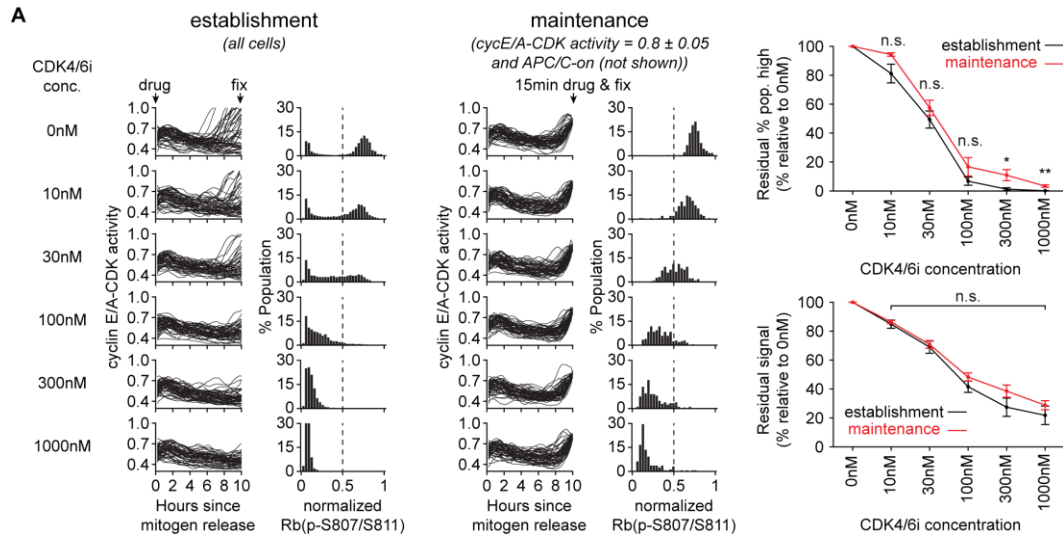

**Figure S3, Related to Figure 4.** (A) MCF-10A expressing cyclin E/A-CDK activity reporter and APC/C degron reporter mitogen-released and treated with CDK4/6i either at the time of mitogen release (establishment) or for 15min prior to fixing (maintenance). For establishment test, no gating performed. For maintenance test, cells computationally gated for  $E/A=0.8 \pm 0.05$  and APC/C deg not rising (not shown) at the time of drug treatment. 50 sample traces per condition shown. (right top) Percentage of cells with normalized Rb(p-S807/S811) > 0.5 calculated for each concentration of CDK4/6i and normalized to the 0nM condition. Error bars are SEM;  $n > 57$ ;  $n = 3$  replicates; 2-sample t-test between each dose (10nM-1000nM) and 0nM:  $p = 0.07, 0.28, 0.16, 0.042, 0.011$ . (right bottom) Alternate analysis: mean of normalized Rb(p-S807/S811) signal calculated for each concentration of CDK4/6i and normalized to the 0nM condition. Error bars are SEM;  $n > 57$  cells per condition;  $n = 3$  replicates; 2-sample t-test:  $p = 0.59, 0.67, 0.17, 0.15, 0.30$ .

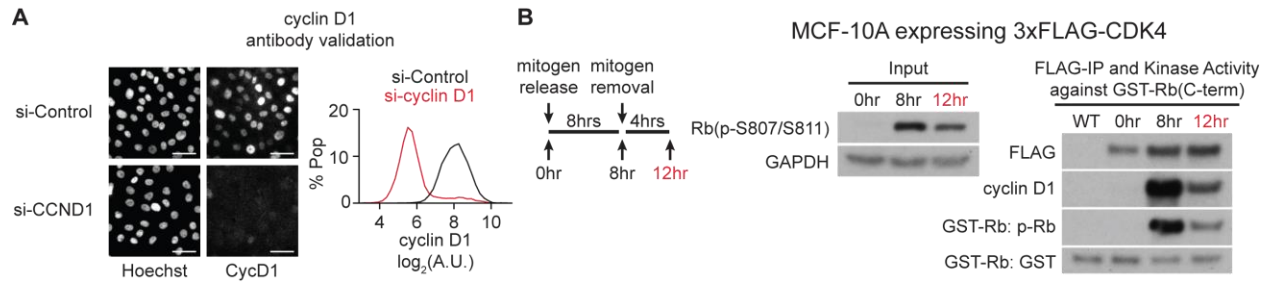

**Figure S4, Related to Figure 5.** (A) MCF-10A mitogen-starved, transfected with siRNA against CCND1, and released for 8hrs prior to fixing and staining for cyclin D1. Scale bar 50 $\mu$ m. n=8000 cells per condition. (B) MCF-10A expressing 3xFLAG-CDK4 treated as indicated and harvested at the indicated times for IP and IP-kinase measurement of cyclin D1 binding and phosphorylation of a GST-Rb fragment (See Methods). Representative of 2 replicates.
